# Supplementary material
Source: Springer Nature journal article supplement (https://www.springerprofessional.de/resource/supplementary/13638_2011_296_MOESM15_ESM.pdf/11897508)
Supplement: MOESM15 [file 11897508]

Set throughput requirement in each room

Set transmit power of access points to be placed

Receiver type

Create pool of candidate access points

Bubble up best access point from the pool \*

Switch on  $AP_{best}$  and add to the set of access points

All coverage requirements met?

N
